# Supplementary material
Source: HighWire-hosted journal article supplement (https://www.cmaj.ca/highwire/filestream/58130/field_highwire_adjunct_files/0/valid-mcintyre-f.pdf)
Supplement: valid-mcintyre-f.pdf [file valid-mcintyre-f.pdf]



# CMAJ · JAMC

LE 22 NOVEMBRE 2005, VOL. 173, N° 11; ONLINE 1-9

## **Mesurer la sévérité de la dépression et la rémission en soins de santé primaires : validation de l'échelle HAMD-7**

## Mesurer la sévérité de la dépression et la rémission en soins de santé primaires : validation de l'échelle HAMD-7

Roger S. McIntyre, Jakub Z. Konarski, Deborah A. Mancini, Kari A. Fulton, Sagar V. Parikh, Sophie Grigoriadis, Larry A. Grupp, David Bakish, Marie-Josée Filteau, Chris Gorman, Charles B. Nemeroff, Sidney H. Kennedy

La version original de cet article a été publiée en anglais dans le numéro du 22 novembre 2005 du *JAMC*.

### RÉSUMÉ

**Contexte :** La rémission des symptômes constitue l'issue optimale de la dépression. Il n'existe pas d'outil bref validé de mesure des symptômes qui puisse indiquer quand il y a eu rémission en contextes de santé mentale et de soins primaires. Nous avons évalué une version abrégée à 7 questions (HAMD-7) de l'échelle de dépression de Hamilton à 17 questions (HAMD-17) au cours d'une étude clinique contrôlée randomisée qui a porté sur des patients atteints d'un trouble dépressif majeur et qui étaient traités en milieu de soins primaires.

**Méthodes :** Nous avons recruté, dans 47 milieux de soins primaires, 454 patients qui satisfaisaient aux critères DSM-IV-TR pour le trouble dépressif majeur. De ce total, on a affecté par randomisation 410 patients qui avaient besoin d'antidépresseurs à une évaluation des symptômes au moyen de l'échelle HAMD-7 ( $n = 205$ ) ou HAMD-17 ( $n = 205$ ) comme principal outil de mesure. La proportion des patients qui ont répondu de la façon définie a priori après huit semaines de traitement, calculé au moyen de chaque instrument, a constitué la principale mesure des résultats.

**Résultats :** Sur les 205 participants par groupe, 67 % de ceux qu'on a évalués au moyen de l'échelle HAMD-7 ont répondu au traitement (réponse définie comme une réduction de  $\geq 50$  % par rapport au résultat avant le traitement), comparativement à 74 % de ceux qu'on a évalués au moyen de l'échelle HAMD-17 ( $p = 0,43$ ). La différence entre l'évolution des résultats des groupes depuis le niveau de référence (avant le traitement) jusqu'au point final a été importante ( $p < 0,001$ ) sans que l'interaction du groupe ( $p = 0,84$ ) ou du groupe dans le temps ( $p = 0,83$ ) ait d'effet principal. Le test HAMD-7 prenait peu de temps à administrer (p. ex., 3 à 4 minutes pour 85 % des médecins de première ligne évalués), ce qui a facilité l'évaluation efficiente et structurée des principaux symptômes dépressifs.

**Interprétation :** L'échelle abrégée de dépression HAMD-7 équivaut à l'échelle HAMD-17 pour évaluer la rémission chez les patients qui suivent une pharmacothérapie contre un trouble dépressif majeur.

Citer cet article comme suit : *CMAJ* 2005;173(11). DOI:10.1503/cmaj.060100

L'application d'un modèle de prise en charge des maladies chroniques comportant des cibles thérapeutiques précises et quantifiables améliore la prise en charge des troubles dépressifs majeurs<sup>1</sup>. Contrairement à plusieurs autres troubles médicaux chroniques, il n'existe pas actuellement de marqueurs biologiques de l'activité morbide dans la dépression. Entre-temps, on suit l'évolution thérapeutique en évaluant les changements dans la sévérité des symptômes dépressifs et les domaines fonctionnels. Cette concaténation de constatations est particulièrement déconcertante étant donné que la plupart des patients déprimés en contexte de soins primaires ou en contexte psychiatrique ne font pas l'objet d'évaluations systématiques fondées sur des mesures quantifiables objectives — lacune qu'il est possible de modifier dans la prise en charge des patients<sup>2-6</sup>.

La réponse au traitement, définie arbitrairement comme une réduction de 50 % ou plus de la sévérité totale des symptômes par rapport à l'évaluation établie avant le traitement de la dépression du patient constitue la mesure de résultats symptomatique signalée le plus souvent dans les études cliniques portant sur des antidépresseurs<sup>7</sup>. Une réponse catégorique au traitement qui ne produit pas l'état de rémission entièrement asymptomatique entraîne une issue insatisfaisante, car elle inclut des patients aux prises avec une activité morbide continue importante sur le plan clinique. Les patients chez lesquels la sévérité des symptômes s'atténue mais qui ne sont pas asymptomatiques risquent de développer une dépression chronique et demeurent vulnérables aux résultats médiocres et à des troubles médicaux comorbides<sup>8-10</sup>.

La rémission est une issue objective indiquée par un résultat quantifiable établi au moyen d'un outil de mesure du symptôme dépressif. Au cours d'études cliniques portant sur des antidépresseurs, l'échelle de la dépression de Hamilton à 17 questions (HAMD-17) a constitué l'«étalon-or» utilisé. Les cliniciens n'acceptent toutefois pas l'échelle HAMD-17 pour de nombreuses raisons<sup>11,12</sup>, notamment à cause de ses lacunes psychométriques et du temps qu'il faut pour l'administrer.

Même si l'on a validé et étudié récemment plusieurs brèves échelles d'évaluation de la dépression qui tentent d'instaurer une amélioration par rapport aux limites de l'échelle HAMD-17<sup>11-18</sup>, aucune échelle brève actuellement disponible et utilisant un seuil de rémission qui concorde

avec la définition la plus souvent citée de la rémission (résultats HAMD-17  $\leq 7$ )<sup>7</sup> n'a été validée en milieu à la fois de soins de santé mentale tertiaires et de soins primaires.

En utilisant l'échelle HAMD-7, nous avons pour objectif général de produire une amélioration par rapport aux lacunes conceptuelles et pratiques de l'échelle HAMD-17. L'échelle HAMD-7 a été dérivée à l'origine d'analyses d'une base de données sur la pratique naturelle à un centre de soins tertiaires qui regroupait des patients chez lesquels on avait diagnostiqué un trouble dépressif majeur ( $n = 248$ )<sup>14</sup>. Les questions de l'échelle HAMD-17, qui avaient été approuvées au cours d'une étude antérieure<sup>14</sup> par  $\geq 70$  % des patients déprimés et étaient les plus sensibles au changement après huit semaines d'efficacité des antidépresseurs, ont formé les éléments constituant des questions de l'échelle HAMD-7 (Annexe 1). On a aussi déterminé pour l'échelle HAMD-7 un score de rémission en corrélation avec l'échelle HAMD-17  $\leq 7$  (Annexe 2)<sup>1,14</sup>. Il fallait quelques minutes pour administrer le questionnaire HAMD-7, qui a constitué une mesure efficace et fiable du progrès thérapeutique et de la rémission des symptômes.

Au cours de cette étude, nous voulions principalement valider l'échelle HAMD-7 en milieu de soins primaires en comparant ses caractéristiques psychométriques à celles de deux outils de mesure acceptés, soit l'échelle HAMD-17 et l'échelle d'évaluation de la dépression de Montgomery-Asberg (MADRS).

## Méthodes

Nous avons identifié des patients anglophones ou francophones âgés de 18 ans ou plus qui satisfaisaient aux critères d'un trouble dépressif majeur (score de référence minimal HAMD-17 de  $\geq 18$ , qu'il s'agisse d'un épisode unique ou d'une récurrence) selon la définition du Manuel diagnostique et statistique des troubles mentaux, quatrième édition, texte révisé (DSM-IV-TR)<sup>19</sup>. Les patients qui avaient une comorbidité psychiatrique ou médicale courante étaient admissibles seulement si l'état comorbide ne constituait pas le principal point de convergence de l'attention clinique. Les patients admissibles ont donné leur consentement éclairé par écrit.

Nous avons exclu les patients dont la dépression était chronique ( $\geq 2$  ans de sévérité des syndromes) ou résistait au traitement (non-réponse à plus de deux antidépresseurs de classes différentes), ou chez lesquels on avait posé un diagnostic clinique primaire autre qu'un trouble dépressif majeur selon le DSM-IV-TR (p. ex., trouble bipolaire). Nous avons aussi exclu les patientes enceintes ou qui allaitaient, les patients qui avaient des problèmes médicaux importants sur le plan clinique et instables (comme des troubles cardiovasculaires ou neurologiques), ceux qui présentaient un risque important de suicide selon les estimations ou qui satisfaisaient aux critères du DSM-IV-TR pour la toxicomanie ou l'asservissement au cours des trois mois précédents.

Comme chercheurs en soins primaires au cours de l'étude, nous avons recruté des personnes pratiquant en cabinet dans n'importe laquelle des quatre provinces les plus peuplées du Canada (Colombie-Britannique, Alberta, Ontario et Québec).

La sélection finale des chercheurs en soins primaires a suivi une consultation d'experts-conseils régionaux en psychiatrie. Nous avons identifié au total 48 chercheurs en soins primaires (dont la liste figure à l'Annexe 3) qui pratiquaient à 47 endroits et dont chacun a reçu une formation détaillée portant sur notre protocole d'étude et sa mise en œuvre. L'Annexe 2 présente des détails sur la formation et les normes.

Tous les chercheurs en soins primaires ont reçu une formation sur les bons guides de pratique<sup>20</sup>. Chaque site a été approuvé par le Conseil central d'examen des établissements, à Aurora (Ont.) et par le Conseil de recherches de l'Université de l'Alberta, à Edmonton (Alb.). À la fin de l'étude, on a demandé à tous les chercheurs en soins primaires de répondre à un questionnaire confidentiel sur l'utilité du questionnaire HAMD-7 et le temps nécessaire pour l'administrer.

Les patients admissibles ont été affectés au moyen de numéros de randomisation produits par ordinateur à l'échelle HAMD-7 ou HAMD-17 comme principal outil de mesure des symptômes avant le début d'une monothérapie aux antidépresseurs à étiquetage dévoilé et à dose flexible d'une durée de huit semaines. La randomisation a eu lieu au cours de la deuxième visite. Les patients qui prenaient un antidépresseur pour la première fois ou qui avaient besoin d'un changement d'antidépresseur étaient admissibles. Les visites après la visite de référence (soit la deuxième visite) ont été prévues aux deux semaines. Les chercheurs en soins primaires ont choisi des médicaments en consultation avec leurs patients parmi les antidépresseurs disponibles au Canada au cours de l'étude (2003-2004) : venlafaxine XR, citalopram, paroxétine, mirtazapine, fluoxétine, bupropion SR, sertraline et nefazodone. Même s'ils pouvaient prendre des médicaments en même temps, les patients ne pouvaient participer simultanément à une psychothérapie guidée par manuel d'intervention (p. ex., thérapie comportementale cognitive ou thérapie interpersonnelle) ou recevoir des électrochocs. On a évalué la sévérité des symptômes au cours de chaque visite au moyen de l'outil HAMD-7 ou HAMD-17 et des échelles de l'impression clinique globale, de l'amélioration ou de la gravité de la maladie (CGI-I/S). On a administré le test MADRS au moment de la visite de référence (deuxième visite) et au point final (sixième visite).

À la fin de l'étude, les chercheurs en soins primaires ont rempli un formulaire d'évaluation de l'échelle HAMD-7, où on leur demandait d'évaluer le temps moyen estimatif nécessaire pour administrer le questionnaire HAMD-7 et d'ajouter des commentaires qualitatifs sur leur satisfaction à cet égard.

On a analysé, au moyen de la statistique sur la dernière observation reportée (LOCF), la population à l'étude (intention de traiter) qui regroupait tous les patients ayant fait l'objet d'au moins une évaluation après le niveau de référence. On a calculé qu'il fallait 375 patients évaluables pour détecter un échantillon à faible effet ( $\geq 0,2$ ) au moyen d'un test t jumelé bilatéral (scores totaux HAMD-7 et HAMD-17 au début et à la fin du traitement) avec corrélation entre groupes de 0,25 à une puissance de 80 %. Si l'on suppose une attrition de 25 % des patients, on visait au début un échantillon de 500 patients.

Afin de pouvoir comparer des scores évalués au moyen de deux mesures de la dépression reliées mais néanmoins différentes, on a calculé un score standard pour toutes les visites

consécutives à la visite de référence (c.-à-d. pour les visites 3 à 6). Pour chaque score HAMD-7 et HAMD-17 obtenu après la randomisation, on a calculé le score standard (z) avec la moyenne du groupe de référence et son écart type (ET) connexe, HAMD-7 14,0 (ET 2,93) et HAMD-17 23,1 (ET 5,09), de la façon suivante :

$$\text{Score } z \text{ HAMD-7} = [(\text{score HAMD-7}) - (14,0)] \div 2,93$$

$$\text{Score } z \text{ HAMD-17} = [(\text{score HAMD-17}) - (23,1)] \div 5,09$$

Nous avons évalué les changements des scores standard en huit semaines de traitement aux antidépresseurs en établissant

des statistiques basées sur des analyses de variance (ANOVA) à mesures répétées où le temps constituait le facteur inhérent au sujet et la randomisation, le facteur entre sujets. On a aussi évalué les différences au cours de chaque visite au moyen d'un test de Student à échantillons indépendants. On a évalué la validité convergente de l'échelle HAMD-7 en établissant des liens entre la sévérité du symptôme dépressif, le changement global, la réponse (réduction de > 50 % des scores totaux MADRS + HAMD-17 avant le traitement) et la rémission des symptômes dépressifs (c.-à-d. MADRS  $\leq$  10, HAMD-17  $\leq$  7) et l'échelle CGI-I/S. Un coefficient de corrélation correspondant à une valeur p de < 0,001 a été jugé significatif sur le plan clinique.

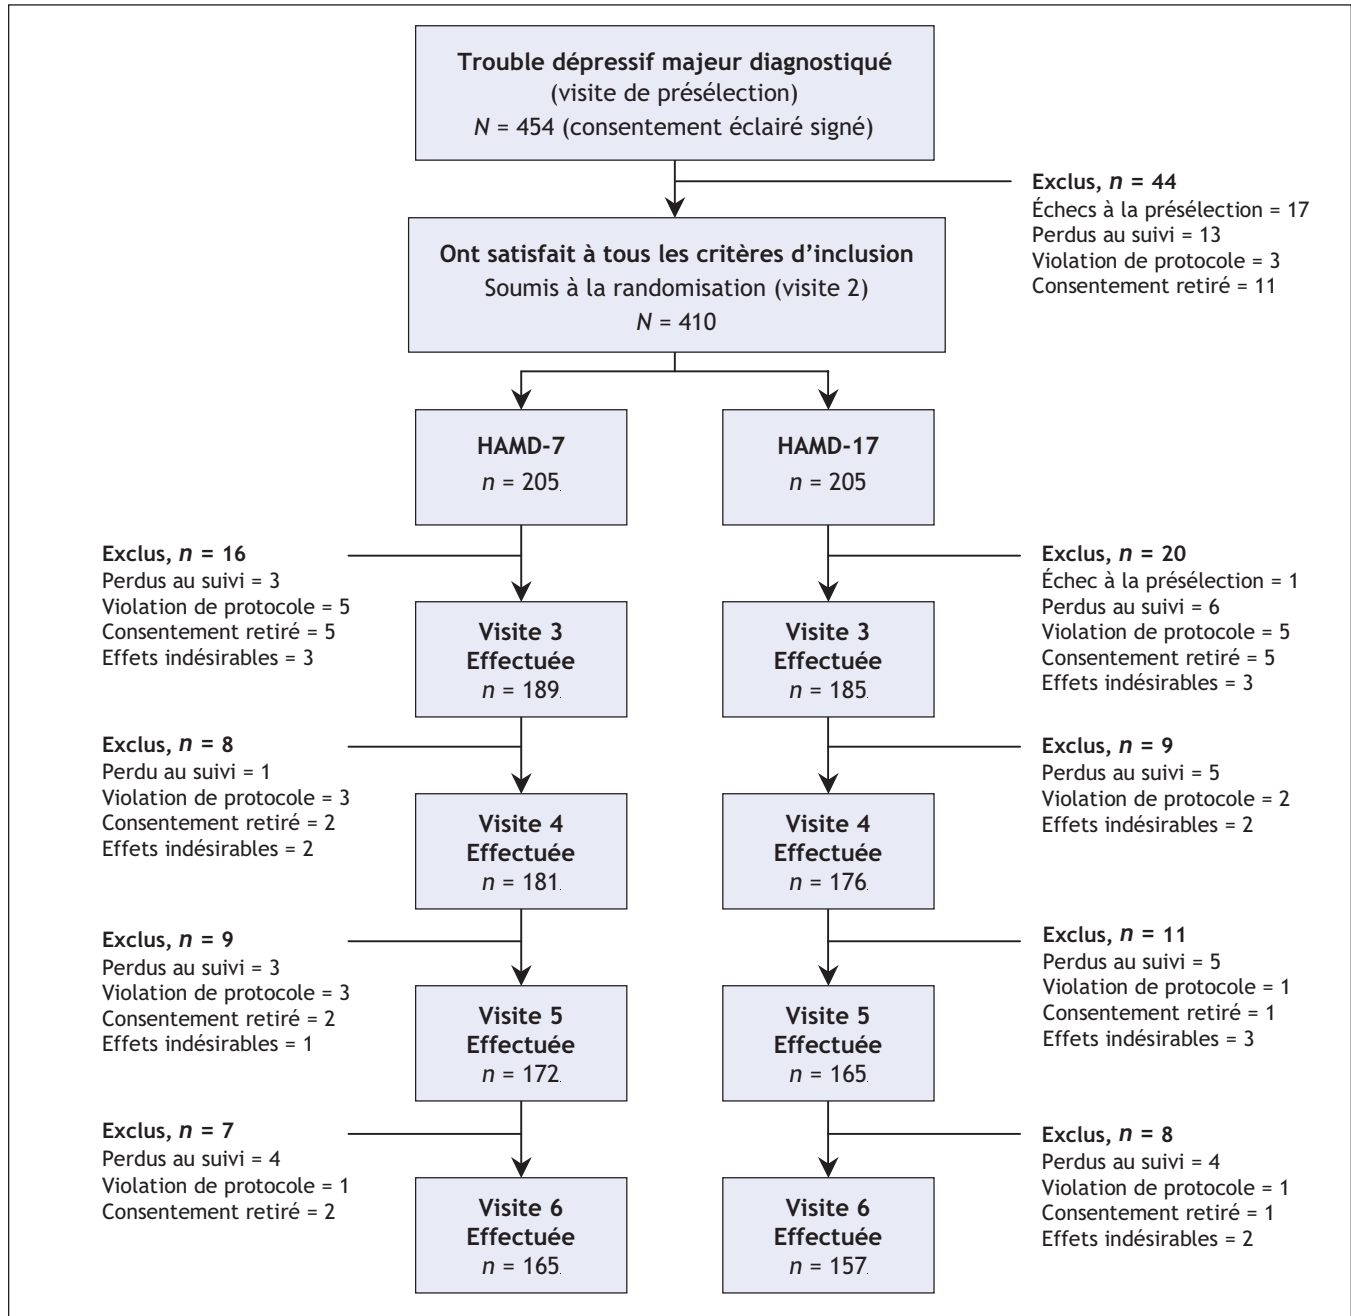

Fig. 1 : Évolution du nombre des sujets du groupe d'étude, de la cohorte d'origine jusqu'au point final (visite 6).

**Tableau 1** : Caractéristiques des patients et résultats de l'étude

| Caractéristique ou variable                                                 | HAMD-17<br>(n = 205) | HAMD-7<br>(n = 205) |
|-----------------------------------------------------------------------------|----------------------|---------------------|
| <b>Caractéristiques de référence</b>                                        |                      |                     |
| Âge moyen (ET), en années                                                   | 43,1 (13,0)          | 42,9 (13,4)         |
| Femmes, nombre (%)                                                          | 131 (64)             | 135 (66)            |
| Un seul épisode*, nombre (%)                                                | 100 (49)             | 94 (46)             |
| Médications concomitantes, nombre (%)                                       | 116 (57)             | 112 (55)            |
| CGI-S, score moyen (ET)                                                     | 4,12 (0,77)          | 4,23 (0,76)         |
| MADRS, score moyen (ET)                                                     | 28,0 (7,6)           | 29,8 (7,0)          |
| <b>Scores HAMD</b>                                                          |                      |                     |
| Référence, moyenne (ET)                                                     | 23,10 (5,09)         | 14,00 (2,93)        |
| Point final, moyenne (ET)                                                   | 8,06 (6,29)          | 5,31 (4,36)         |
| <b>Résultats de l'étude : patients montant une amélioration, nombre (%)</b> |                      |                     |
| Réponse† : score réduit ≥ 50 %                                              | 152 (74)             | 137 (67)            |
| Rémission‡ : score HAMD-17 ≤ 7 ou score HAMD-7 ≤ 3                          | 100 (49)             | 82 (40)             |

Note : HAMD = échelle de dépression de Hamilton à 17 ou 7 questions, ET = écart type, CGI-S = impression clinique globale - sous-échelle de la sévérité de la maladie, MADRS = échelle de dépression de Montgomery-Asberg.  
\* Par rapport aux épisodes dépressifs répétitifs.

†  $p = 0,43$   
‡  $p = 0,17$

On a défini la réponse au traitement comme une réduction de  $\geq 50$  % de la sévérité des symptômes de dépression avant le traitement. On a défini la rémission comme un score final de  $\leq 7$  au test HAMD-17, de  $\leq 3$  au test HAMD-7 et de  $\leq 10$  au test MADRS. On a analysé les données catégoriques au moyen de la statistique  $\chi^2$ . On a comparé les variables dichotomiques (c.-à-d. réponses et rémission) au moyen du test exact de Fisher. On a utilisé le coefficient de corrélation de Pearson ( $r$ ) conjugué à un test bilatéral d'importance pour quantifier la concordance entre les scores totaux des tests MADRS, HAMD-7 et HAMD-17. On a employé des coefficients de corrélation de Spearman ( $r$ ) pour comparer les scores HAMD-7 et HAMD-17 aux mesures ordinales CGI-S et CGI-I. On a évalué l'uniformité interne de l'échelle HAMD-7 au moyen de la statistique du coefficient alpha de Cronbach pour toutes les mesures de sévérité de la dépression.

## Résultats

Sur les 454 patients [164 hommes (36,1 %) et 290 femmes (63,9 %)] inscrits à l'étude (Fig. 1), on en a affecté par randomisation 410 au total à l'échelle HAMD-7 ( $n = 205$ ) ou HAMD-17 ( $n = 205$ ) comme principale échelle de mesure des symptômes (Tableau 1).

Les scores totaux moyens ont varié de 14,0 avant le traitement à 5,31 au point final chez les patients évalués au moyen de l'échelle HAMD-7, et de 23,1 avant le traitement à 8,06 au point final chez ceux qu'on a évalués au moyen de l'échelle

**Tableau 2** : Uniformité interne de l'évaluation ( $\alpha$ )\* des versions à 7 et 17 questions de l'échelle de dépression de Hamilton (HAMD)

| Échelle  | Visite |       |       |       |       |
|----------|--------|-------|-------|-------|-------|
|          | 2†     | 3     | 4     | 5     | 6     |
| HAMD-7   | 0,51   | 0,757 | 0,792 | 0,796 | 0,843 |
| HAMD-7A‡ | 0,57   | 0,737 | 0,808 | 0,805 | 0,825 |
| HAMD-17  | 0,57   | 0,776 | 0,819 | 0,840 | 0,848 |

\* Exprimé sous forme de  $\alpha$  de Cronbach; toutes les valeurs  $> 0,70$  ont été jugées satisfaisantes.

† Les scores de référence avant le traitement ont été consignés au cours de la visite 2.

‡ Sept questions abrégées de l'échelle HAMD-17 qui figurent aussi dans l'échelle HAMD-7.

HAMD-17. La réduction totale du score a été très significative ( $p < 0,001$ ), telle que mesurée avec l'une ou l'autre des échelles d'évaluation (Tableau 1). Les différences entre groupes quant au pourcentage des patients qui ont répondu au traitement ou qui ont connu une rémission chez les sujets évalués au moyen de l'échelle HAMD-7 (67 % qui ont répondu et 40 % qui ont connu une rémission) et de l'échelle HAMD-17 (74 % et 49 % respectivement) n'étaient pas significatives ( $p = 0,43$  et  $0,17$  respectivement). Le changement entre le score avant le traitement et celui qu'on a établi au point final au moyen des évaluations normalisées HAMD-17 et HAMD-7 ( $p < 0,001$ ) a aussi été important sans que le groupe ( $p = 0,84$ ) ou l'interaction du groupe en fonction du temps ( $p = 0,83$ ) n'ait d'effet principal, ce qui indique que les deux échelles sont aussi sensibles l'une que l'autre au changement.

Chez les sujets évalués au moyen de l'échelle HAMD-17 comme principal outil de mesure des symptômes, on a résumé les questions incluses dans l'échelle HAMD-7 (HAMD-7A) et on a constaté qu'il y avait une corrélation importante avec les scores totaux de l'échelle HAMD-17 ( $p < 0,001$ ). On a établi une corrélation importante entre l'évolution de la sévérité du symptôme dépressif depuis la période qui a précédé le traitement jusqu'au point final, le taux de réponse et le taux de rémission établis au moyen des échelles HAMD-7A et HAMD-17 (tous  $p < 0,001$ ).

La cohérence interne des évaluations HAMD-7, HAMD-7A et HAMD-17 au cours de chaque visite qui a suivi l'établissement des données de référence a été satisfaisante et comparable (Tableau 2). La comparaison avec l'échelle d'évaluation de la dépression MADRS a démontré que les échelles HAMD 7, HAMD-7A et HAMD-17 montrent aussi une validité convergente satisfaisante aux niveaux de la sévérité du symptôme dépressif, du changement global, de la réponse (réduction de  $\geq 50$  % par rapport au score MADRS total avant le traitement) et de la rémission des symptômes dépressifs (MADRS  $\leq 10$ ) (Tableau 3). On a établi aussi une corrélation importante entre l'estimation de la sévérité du symptôme dépressif et le changement produit par le traitement entre l'échelle HAMD-7 et l'échelle CGI-I/S (Tableau 4).

Sur 48 médecins, 39 (82 %) ont rempli le formulaire d'évaluation par le chercheur de l'échelle d'évaluation HAMD-7.

**Tableau 3** : Validité convergente ( $r$ )\* des versions à 7 et à 17 questions de l'échelle de dépression de Hamilton avec l'échelle de dépression de Montgomery-Asberg

| Version HAMD | Corrélation* avec MADRS |             |                               |                    |
|--------------|-------------------------|-------------|-------------------------------|--------------------|
|              | Sévérité des symptômes  |             | Changement avec le traitement |                    |
|              | Avant traitement        | Point final | Taux de réponse†              | Taux de rémission‡ |
| HAMD-7       | 0,576                   | 0,904       | 0,716                         | 0,662              |
| HAMD-7A§     | 0,649                   | 0,894       | 0,747                         | 0,615              |
| HAMD-17      | 0,672                   | 0,923       | 0,730                         | 0,710              |

\* Exprimé sous forme d'un coefficient de corrélation de Pearson ( $p < 0,001$  pour toutes les valeurs  $r$  indiquées).

† Une réponse au traitement est un score au point final de 50 % ou moins du score avant le traitement.

‡ Pour qu'il y ait rémission totale, il faut un score  $\leq 3$  (HAMD-7, HAMD-7A) ou  $\leq 7$  (HAMD-17).

§ Sept questions abrégées tirées de l'échelle HAMD-17 qui figurent aussi dans l'échelle HAMD-7.

Les médecins ont signalé une satisfaction générale élevée à l'égard de l'échelle HAMD-7 et indiqué qu'elle prenait peu de temps à administrer (3 à 4 minutes pour 85 % des répondants), ce qui facilitait l'évaluation efficiente et structurée des principaux symptômes dépressifs.

## Interprétation

L'échelle HAMD-7 s'est révélé aussi sensible que l'échelle HAMD-17 lorsqu'il s'agit d'estimer la sévérité des symptômes dépressifs et d'évaluer l'efficacité d'un traitement aux antidépresseurs en contexte de soins primaires naturalistes. Le pourcentage des patients chez lesquels on a estimé, au moyen de l'échelle HAMD-7, qu'il y avait eu rémission était statistiquement semblable à celui de «l'étalon-or», soit l'échelle d'évaluation HAMD-17. Une corrélation importante avec les échelles multidimensionnelles MADRS et CGI-I/S et des niveaux acceptables de sensibilité et de spécificité ont indiqué que la brièveté de l'échelle HAMD-7 n'a pas semblé compromettre l'information vitale sur le progrès du patient et ses résultats. (On décrit plus en détail dans un document d'accompagnement subséquent la sensibilité, la spécificité et autres caractéristiques psychométriques.)

Au cours de la dernière décennie, on a mis l'accent sur un état de rémission entièrement asymptomatique comme point final critique de la prise en charge des patients déprimés. Il n'existe toutefois pas actuellement de critère universellement reconnu sur la rémission, ce qui nie l'utilité clinique du concept de rémission. La définition et les critères opérationnels proposés pour la rémission (HAMD-17  $\leq 7$ ) par le groupe de la Fondation McArthur<sup>21</sup>, qui constituent la définition de la rémission citée le plus souvent, ont néanmoins servi de règle heuristique utile.

Plusieurs lignes directrices d'experts de multiples pays sur la prise en charge des troubles dépressifs mettent l'accent sur la rémission, issue qui transcende la réponse, comme point final symptomatique réalisable et plus pertinent sur le plan

**Tableau 4** : Validité convergente ( $\rho$ )\* des scores HAMD avec les cotes de la sous-échelle CGI

| Scores   | Corrélation entre les scores HAMD et les cotes CGI |       |       |       |       |                                        |
|----------|----------------------------------------------------|-------|-------|-------|-------|----------------------------------------|
|          | Visite; HAMD et sévérité de la maladie CGI         |       |       |       |       | Changement HAMD‡ avec amélioration CGI |
|          | 2†                                                 | 3     | 4     | 5     | 6     |                                        |
| HAMD-7   | 0,655                                              | 0,721 | 0,781 | 0,839 | 0,865 | -0,644                                 |
| HAMD-7A§ | 0,517                                              | 0,723 | 0,806 | 0,822 | 0,868 | -0,599                                 |
| HAMD-17  | 0,624                                              | 0,754 | 0,818 | 0,850 | 0,848 | -0,599                                 |

Note : HAMD = Échelle de dépression de Hamilton, CGI = échelle de l'Impression clinique globale.

\* Les corrélations sont exprimées sous forme de  $\rho$  de Spearman ( $p < 0,001$  pour toutes les valeurs  $\rho$  indiquées).

† Niveau de référence avant le traitement.

‡ Score HAMD de référence (visite 2) moins score HAMD au point final (visite 6).

§ Sept questions abrégées tirées de l'échelle HAMD-17 qui figurent aussi dans l'échelle HAMD-7.

clinique<sup>1,22-24</sup>. On établit un lien entre les symptômes dépressifs résiduels et la rémission incomplète, d'une part, et la rechute précoce, des intervalles plus courts entre les crises de dépression, la chronicité, un pronostic médiocre relié à des troubles médicaux comorbides, le recours accru aux services médicaux, l'élévation soutenue du risque de suicide et des déficits psychosociaux et fonctionnels, d'autre part<sup>25</sup>.

Comme il n'y a pas de marqueur biologique utile sur le plan clinique et validé pour la rémission de la dépression, les cliniciens sont limités à évaluer de façon empirique les symptômes dépressifs et les domaines fonctionnels<sup>2</sup>. La plupart des praticiens n'évaluent pas systématiquement les progrès des patients au moyen de paramètres quantifiables, ce qui est paradoxal. Même s'il est probable que de multiples variables ont un effet sur la volonté clinique de suivre attentivement les symptômes dépressifs, il est probable que des outils efficaces en terme de temps seraient acceptés davantage sur le terrain.

Les limitations de cette étude de validation comprennent l'hétérogénéité des patients inscrits et du traitement. Les critères de diagnostic d'une crise dépressive majeure en cours, par exemple, reposaient sur le jugement clinique et il n'y avait aucun contrôle rigoureux de la présence d'une comorbidité, à l'exception des critères d'exclusion décrits ci-avant. Même si, sur le plan statistique, les scores établis par l'échelle MADRS avant le traitement étaient beaucoup plus élevés chez les sujets du groupe affecté par randomisation à l'échelle HAMD-7, les différences entre les groupes sont non significatives sur le plan clinique. La présomption selon laquelle les scores-seuils de  $\leq 7$  ou de  $\leq 10$  pour les échelles HAMD-17 ou MADRS respectivement démontrent à prime abord une rémission de l'épisode dépressif constitue une autre limite. On a signalé, par exemple, que des patients déprimés qui ont un score de  $\leq 7$  selon l'échelle HAMD-17 manifestent toujours une activité morbide importante sur le plan clinique<sup>26</sup>. Il convient aussi de signaler que nous avons choisi l'échelle HAMD-17 comme norme principale parce qu'elle est la plus couramment utilisée et qu'elle est très connue comme outil de mesure à la fois en recherche clinique sur la dépression et chez les cliniciens. On aurait pu aussi com-

parer les résultats HAMD-7 à ceux de l'échelle MADRS ou de la mesure de la psychopathologie globale, CGI. Enfin, pour diverses raisons, 44 patients se sont retirés de l'étude après la randomisation mais avant le début du traitement et n'ont pas été inclus dans l'analyse. L'inclusion de ces patients et l'affectation d'un résultat à chacun d'entre eux n'ont pas eu d'effet important sur les résultats statistiques.

Dans un contexte occupé de soins primaires, les questionnaires d'évaluation autoadministrés<sup>17,27</sup> constituent une solution de rechange attrayante aux questionnaires MADRS, HAMD-17 et autres outils plus longs de mesure de la dépression. Plusieurs études, y compris une méta-analyse, ont toutefois permis de déterminer que les questionnaires administrés par les cliniciens peuvent être plus sensibles au changement que les mesures autoévaluées, en particulier dans le contexte d'études de courte durée<sup>28,29</sup>. Un marqueur pratique et significatif de la rémission devrait évaluer simultanément les résultats à la fois symptomatiques et fonctionnels. L'échelle HAMD-7 est avant tout un outil de mesure de symptômes qui impose une surveillance supplémentaire des résultats fonctionnels. De plus, les doses moyennes d'antidépresseurs utilisées au cours de l'étude se situaient à l'extrémité inférieure des plages recommandées. Il convient toutefois d'insister sur le fait que le milieu naturaliste, la non-normalisation du traitement choisi et l'hétérogénéité des patients dans le contexte de cette étude reflètent la pratique dans le monde réel.

## Conclusion

L'échelle d'évaluation HAMD-7 est la première échelle d'évaluation de la dépression rapide à administrer qui comporte un seuil de rémission validé en milieu à la fois de soins primaires et de soins spécialisés en santé mentale. Le seuil de rémission (corrélation avec un score de  $\leq 7$  selon l'échelle HAMD-17) distingue l'échelle HAMD-7 de toute autre mesure brève de la dépression qui existe actuellement. La prise en charge de la dépression devrait viser comme objectif thérapeutique un score de  $\leq 3$  selon l'échelle HAMD-7. Une recherche future visera à déterminer si cette mesure objective correspond à une absence d'activité morbide (p. ex., démontrée par des biomarqueurs neuroradiologiques et neuro-endocriniens). L'utilisation clinique de routine de l'échelle HAMD-7 produit des preuves objectives quantifiables de la sévérité du symptôme dépressif, de l'efficacité des antidépresseurs et de la rémission de la maladie.

Cet article a été critiqué par des pairs.

Du Réseau de santé universitaire, Toronto (Ont.) – McIntyre, Parikh, Grigoriadis, Kennedy; Département de psychiatrie, Université de Toronto, Toronto (Ont.) – McIntyre, Konarski, Mancini, Fulton, Parikh, Grigoriadis, Grupp, Kennedy; Institut des sciences médicales, Université de Toronto, Toronto (Ont.) – Konarski, Kennedy; Département de pharmacologie, Université de Toronto, Toronto (Ont.) – Grupp; Clinique de psychopharmacologie d'Ottawa, Ottawa (Ont.) – Bakish; Centre de recherche Université Laval Robert-Giffard, Beauport (Qué.) – Filteau; Département de psychiatrie, Université de Calgary, Calgary (Alb.) – Gorman; Faculté de médecine, Université Emory, Atlanta (Ga) – Nemeroff.

**Intérêts concurrents :** Aucun déclaré par Jakub Konarski, Deborah Mancini, Kari Fulton, Sophie Grigoriadis, Larry Grupp, Marie-Josée Filteau ou Chris

Gorman. Roger McIntyre reçoit de l'aide sous forme de subvention de recherche et est consultant pour Wyeth, AstraZeneca, Janssen, Eli Lilly, Bristol-Myers Squibb, Merck, Pfizer, Organon, Lundbeck, GlaxoSmithKline et Prestwick, et fait partie de leur bureau de conférenciers. Sagar Parikh a reçu des honoraires de consultation et de formation de Wyeth. Au cours des deux dernières années, David Bakish a reçu des subventions pour effectuer de la recherche sur les produits fabriqués par Eli Lilly, Roche Canada, Wyeth, Lundbeck Canada, Shire Canada, Pfizer Canada, Boehringer Ingelheim Canada, Sanofi Aventis et AstraZeneca, ainsi que des honoraires de conférencier de Wyeth Canada, de Lundbeck Canada, d'Eli Lilly Canada et de Shire Canada. Charles Nemeroff a reçu des subventions et de l'aide à la recherche d'Abbott, d'AstraZeneca, de Bristol-Myers Squibb, d'Eli Lilly, de Forest, GlaxoSmithKline, Janssen, de la National Alliance for Research on Schizophrenia and Depression, du National Institute of Mental Health, d'Organon, de Pfizer, Pharmacia-Upjohn, de la Fondation Stanley/NAMI et de Wyeth-Ayerst; il a été consultant ou conférencier pour Abbott, Acadia, AstraZeneca, Bristol-Myers Squibb, Cephalon, Corcept, Cypress Biosciences, Eli Lilly, Forest, GlaxoSmithKline, Janssen, Merck, Mindsense, Neurocrine Biosciences, Novartis, Organon, Otsuka, Pfizer, Pharmacia-Upjohn, Somerset, Vela et Wyeth-Ayerst; il est aussi actionnaire de Corcept. Sidney Kennedy a reçu de l'aide à la recherche de Pfizer, d'AstraZeneca, d'Organon et de Boehringer Ingelheim; il est membre des bureaux des conférenciers de Lundbeck, d'Organon, de Wyeth-Ayerst et de GlaxoSmithKline, et siège aux conseils consultatifs de Pfizer, de la Fondation Lundbeck, d'Eli Lilly, de GlaxoSmithKline et de Servier.

**Contributeurs :** Roger McIntyre et Sidney Kennedy ont participé à l'élaboration du concept de l'étude et à sa conception, ainsi qu'à la production du manuscrit et à sa révision critique. Deborah Mancini a participé activement à la révision critique du manuscrit, ainsi qu'à l'acquisition et à la gestion des données. Jakub Konarski a participé à la production du manuscrit et à sa révision critique, ainsi qu'à l'acquisition et à la gestion des données. Charles Nemeroff a contribué à la production et à la révision critique du manuscrit. Chris Gorman, David Bakish et Larry Grupp ont participé à la conception de l'étude, ainsi qu'à la révision critique du manuscrit. Charles Nemeroff a contribué à la production du manuscrit et à sa révision critique. Marie-Josée Filteau et Kari Fulton ont effectué la révision critique du manuscrit et l'acquisition des données. Sagar Parikh et Sophie Grigoriadis ont aussi participé à la révision critique du manuscrit.

**Remerciements :** Nous remercions R. Michael Bagby de ses commentaires précieux au sujet de l'élaboration de l'échelle HAMD-7, Ed Vidgen, Robyn Beck, Isaac Chen et Barry McFarlane, de leur aide technique et tous les chercheurs en soins primaires, de leurs commentaires.

Cette étude a bénéficié de l'appui de Wyeth Canada Inc.

## RÉFÉRENCES

1. Thase ME, Sloan DM, Kornstein SG. Remission as the critical outcome of depression treatment. *Psychopharmacol Bull* 2002;36(4 Suppl 3):12-25.
2. Keller MB. Past, present, and future directions for defining optimal treatment outcome in depression: remission and beyond. *JAMA* 2003;289(23):3152-60.
3. Von Korff M, Katon W, Unutzer J, Wells K, Wagner EH. Improving depression care: barriers, solutions, and research needs. *J Fam Pract* 2001;50(6):E1.
4. Glassman AH, Shapiro PA. Depression and the course of coronary artery disease. *Am J Psychiatry* 1998;155(1):4-11.
5. Wells KB, Stewart A, Hays RD, Burnam MA, Rogers W, Daniels M, Berry S, Greenfield S, Ware J. The functioning and well-being of depressed patients: results from the Medical Outcomes Study. *JAMA* 1989;262(7):914-9.
6. Kessler RC, Berglund P, Demler O, Jin R, Koretz D, Merikangas KR, Rush AJ, Walters EE, Wang PS. The epidemiology of major depressive disorder: results from the National Comorbidity Survey Replication (NCS-R). *JAMA* 2003;289(23):3095-105.
7. Frank E, Prien RF, Jarrett RB, Keller MB, Kupfer DJ, Lavori PW, et al. Conceptualization and rationale for consensus definitions of terms in major depressive disorder: remission, recovery, relapse, and recurrence. *Arch Gen Psychiatry* 1991;48(9):851-5.
8. Judd LL, Akiskal HS, Maser JD, Zeller PJ, Endicott J, Coryell W, et al. A prospective 12-year study of subsyndromal and syndromal depressive symptoms in unipolar major depressive disorders. *Arch Gen Psychiatry* 1998;55(8):694-700.
9. Brown ES, Varghese FP, McEwen BS. Association of depression with medical illness: Does cortisol play a role? *Biol Psychiatry* 2004;55(1):1-9.
10. Paykel ES. Remission and residual symptomatology in major depression. *Psychopathology* 1998;31(1):5-14.
11. Faries D, Herrera J, Rayamajhi J, DeBrot D, Demitrack M, Potter WZ. The responsiveness of the Hamilton Depression Rating Scale. *J Psychiatr Res* 2000;34(1):3-10.

12. Bagby RM, Ryder AG, Schuller DR, Marshall MB. The Hamilton Depression Rating Scale: Has the gold standard become a lead weight? *Am J Psychiatry* 2004;161(12):2163-77.
13. Bech P, Gram LF, Dein E, Jacobsen O, Vitger J, Bolwig TG. Quantitative rating of depressive states. *Acta Psychiatr Scand* 1975;51(3):161-70.
14. McIntyre R, Kennedy S, Bagby RM, Bakish D. Assessing full remission. *J Psychiatry Neurosci* 2002;27(4):235-9.
15. Maier W, Philipp M, Heuser I, Schlegel S, Buller R, Wetzl H. Improving depression severity assessment — I. Reliability, internal validity and sensitivity to change of three observer depression scales. *J Psychiatr Res* 1988;22(1):3-12.
16. Gibbons RD, Clark DC, Kupfer DJ. Exactly what does the Hamilton Depression Rating Scale measure? *J Psychiatr Res* 1993;27(3):259-73.
17. Spitzer RL, Kroenke K, Williams JB. Validation and utility of a self-report version of PRIME-MD: the PHQ Primary Care Study. Primary Care Evaluation of Mental Disorders. Patient Health Questionnaire. *JAMA* 1999;282(18):1737-44.
18. Zimmerman M, Posternak MA, Chelminski I. Using a self-report depression scale to identify remission in depressed outpatients. *Am J Psychiatry* 2004;161:1911-3.
19. *Manuel diagnostique et statistique des troubles mentaux*. 4<sup>e</sup> éd, texte rév. Paris : Masson, C2003.
20. Papakostas GI, Petersen T, Hughes ME, Nierenberg AA, Alpert JE, Fava M. Anxiety and somatic symptoms as predictors of treatment-related adverse events in major depressive disorder. *Psychiatry Res* 2004;126(3):287-90.
21. Frank E, Kupfer DJ, Perel JM, Cornes C, Mallinger AG, Thase ME, et al. Comparison of full-dose versus half-dose pharmacotherapy in the maintenance treatment of recurrent depression. *J Affect Disord* 1993;27(3):139-45.
22. American Psychiatric Association. Practice guideline for the treatment of patients with major depressive disorder (revision). *Am J Psychiatry* 2000;157(4 Suppl):1-45.
23. Anderson IM, Nutt DJ, Deakin JF; British Association for Psychopharmacology. Evidence-based guidelines for treating depressive disorders with antidepressants: a revision of the 1993 British Association for Psychopharmacology guidelines [analyse critique]. *J Psychopharmacol* 2000;14(1):3-20.
24. Kennedy SH, Lam RW, Cohen NL, Ravindran AV. Clinical guidelines for the treatment of depressive disorders. IV. Medications and other biological treatments. *R can psychiatrie* 2001;46(Suppl 1):38S-58S.
25. Keller MB. Remission versus response: the new gold standard of antidepressant care. *J Clin Psychiatry* 2004;65(Suppl 4):53-9.
26. Nierenberg AA, Keefe BR, Leslie VC, Alpert JE, Pava JA, Worthington JJ 3rd, et al. Residual symptoms in depressed patients who respond acutely to fluoxetine. *J Clin Psychiatry* 1999;60(4):221-5.
27. Beck AT, Ward CH, Mendelson M, Mock J, Erbaugh J. An inventory for measuring depression. *Arch Gen Psychiatry* 1961;4:561-71.
28. Lambert MJ, Masters KS, Astle D. An effect-size comparison of the Beck, Zung, and Hamilton Rating Scales for Depression: a three-week and twelve-week analysis. *Psychol Rep* 1988;63(2):467-70.
29. Sayer NA, Sackeim HA, Moeller JR, Prudic J, Devanand DP, Coleman EA, Kierys JE. The relations between observer-rating and self-report of depressive symptomatology. *Psychol Assess* 1993;5:350-60.

**Correspondance :** Dr Roger S. McIntyre, Mood Disorder Psychopharmacology Unit, University Health Network, 399 Bathurst St., Toronto (Ontario) M5T 2S8 (télécopieur : 416 603 5368; courriel : roger.mcintyre@uhn.on.ca).

## Aperçu de la rédaction

- Il importe de déterminer quand les patients traités pour un trouble dépressif majeur se rétablissent ou entrent en rémission.
- Dans cette ECR, on a réparti au hasard des patients traités au moyen d'agents pharmacologiques contre une dépression pour qu'ils fassent l'objet d'évaluations continues au moyen d'un questionnaire de recherche normalisé à 17 questions, soit l'échelle HAMD-17, ou d'une version clinique abrégée de celle-ci, soit l'échelle HAMD-7. La version abrégée s'est révélée aussi efficace que la version intégrale pour détecter les rémissions.

**Répercussions sur la pratique :** On peut utiliser l'échelle de dépression HAMD-7 à sept questions pour déterminer quand les patients qui ont des troubles dépressifs majeurs sont en rémission.



## Annexe 1 : L'échelle de dépression de Hamilton à sept questions (HAMD-7)

|                                                                                                                                                                                                                                                                                                                                                                                                                                                                                                                                                                                                                                                                                                      |                                                                                                                                                                                                                                                                                                                                                                                                                                                                                   |
|------------------------------------------------------------------------------------------------------------------------------------------------------------------------------------------------------------------------------------------------------------------------------------------------------------------------------------------------------------------------------------------------------------------------------------------------------------------------------------------------------------------------------------------------------------------------------------------------------------------------------------------------------------------------------------------------------|-----------------------------------------------------------------------------------------------------------------------------------------------------------------------------------------------------------------------------------------------------------------------------------------------------------------------------------------------------------------------------------------------------------------------------------------------------------------------------------|
| <p><b>1. Humeur dépressive (tristesse, avoir «les bleus», tendance à pleurer)</b></p> <ul style="list-style-type: none"> <li>• Avez-vous ressenti de l'abattement ou de la dépression au cours de la semaine écoulée?</li> <li>• À quelle fréquence et pendant combien longtemps?</li> </ul>                                                                                                                                                                                                                                                                                                                                                                                                         | <p>[ ] 0 Absent<br/>           [ ] 1 Indiqué seulement si l'on interroge le sujet.<br/>           [ ] 2 Signalé verbalement spontanément.<br/>           [ ] 3 Le sujet communique ses états affectifs non verbalement (expression faciale, attitude, voix, tendance à pleurer).<br/>           [ ] 4 Le sujet communique <i>à peu près seulement</i> ses états affectifs dans ses communications spontanées, verbales et non verbales.</p>                                       |
| <p><b>2. Sentiments de culpabilité (autocritique, auto-reproche)</b></p> <ul style="list-style-type: none"> <li>• Au cours de la semaine écoulée, avez-vous ressenti de la culpabilité à l'égard de quelque chose que vous avez fait ou avez-vous pensé que vous avez laissé tomber quelqu'un?</li> <li>• Pensez-vous que votre maladie est une punition?</li> </ul>                                                                                                                                                                                                                                                                                                                                 | <p>[ ] 0 Absent<br/>           [ ] 1 S'adresse des reproches à lui-même (laisse tomber des gens).<br/>           [ ] 2 Idées de culpabilité, rumination sur des erreurs passées ou des actes condamnables.<br/>           [ ] 3 Considère sa maladie comme une punition; délire de culpabilité.<br/>           [ ] 4 Entend des voix qui l'accusent ou le dénoncent, ou a des hallucinations visuelles menaçantes.</p>                                                            |
| <p><b>3. Intérêt, plaisir, niveau d'activité (travail et activités de la vie quotidienne)</b></p> <ul style="list-style-type: none"> <li>• Votre productivité au travail et à la maison est-elle la même que d'habitude?</li> <li>• Avez-vous ressenti de l'intérêt pour des choses qui vous intéressent habituellement?</li> </ul>                                                                                                                                                                                                                                                                                                                                                                  | <p>[ ] 0 Aucune difficulté<br/>           [ ] 1 Fatigue, faiblesse ou sentiment d'incapacité (reliés aux activités, au travail ou aux loisirs).<br/>           [ ] 2 Perte d'intérêt dans les activités (signalée directement ou indirectement par l'empathie, l'indécision et l'hésitation).<br/>           [ ] 3 Baisse de la productivité ou diminution du temps réel consacré à des activités.<br/>           [ ] 4 A cessé de travailler à cause de la maladie en cours.</p> |
| <p><b>4. Tension, nervosité (anxiété psychologique)</b></p> <ul style="list-style-type: none"> <li>• Avez-vous ressenti plus de tension ou de nervosité que d'habitude cette semaine?</li> <li>• Vous inquiétez-vous beaucoup?</li> </ul>                                                                                                                                                                                                                                                                                                                                                                                                                                                            | <p>[ ] 0 Aucune difficulté<br/>           [ ] 1 Tension subjective et irritabilité.<br/>           [ ] 2 Se soucie de problèmes mineurs.<br/>           [ ] 3 Appréhension apparente dans l'expression faciale et la parole.<br/>           [ ] 4 Peur exprimée sans que l'on pose de question.</p>                                                                                                                                                                               |
| <p><b>5. Symptômes physiques de l'anxiété (anxiété somatique)</b></p> <ul style="list-style-type: none"> <li>• Combien de ces problèmes vous ont préoccupé au cours de la semaine écoulée?</li> </ul> <p>NE PAS COTER SI LES SYMPTÔMES SONT CLAIREMENT ATTRIBUABLES AUX MÉDICAMENTS :</p> <ul style="list-style-type: none"> <li>• Au cours de la semaine écoulée, avez-vous ressenti un de ces symptômes?</li> <li>- Gastro-intestinaux : bouche sèche, flatulence, indigestion, diarrhée, crampes, éructation</li> <li>- Vasculaires : palpitations cardiaques, maux de tête</li> <li>- Respiratoires : hyperventilation, soupirs</li> <li>- Envie fréquente d'uriner</li> <li>- Sueurs</li> </ul> | <p>[ ] 0 Aucun de ces symptômes<br/>           [ ] 1 Symptômes légers<br/>           [ ] 2 Symptômes modérés<br/>           [ ] 3 Symptômes sévères<br/>           [ ] 4 Symptômes invalidants</p>                                                                                                                                                                                                                                                                                |
| <p><b>6. Niveau d'énergie (symptômes somatiques)</b></p> <ul style="list-style-type: none"> <li>• Quel a été votre niveau d'énergie au cours de la semaine écoulée?</li> <li>• Avez-vous ressenti de la fatigue?</li> <li>• Avez-vous ressenti des maux ou des douleurs, une lourdeur dans les membres, le dos ou la tête?</li> </ul>                                                                                                                                                                                                                                                                                                                                                                | <p>[ ] 0 Aucun<br/>           [ ] 1 Lourdeur dans les membres, le dos ou la tête (maux de dos, maux de tête, douleurs musculaires; perte d'énergie et fatiguabilité).<br/>           [ ] 2 Tout symptôme clair vaut 2 points.</p>                                                                                                                                                                                                                                                 |
| <p><b>7. Suicide (idées, réflexions, plans, tentatives)</b></p> <ul style="list-style-type: none"> <li>• Avez-vous pensé que la vie ne faut pas la peine d'être vécue ou que la mort serait préférable?</li> <li>• Avez-vous pensé à vous blesser ou vous tuer?</li> <li>• Avez-vous fait quelque chose pour vous blesser?</li> </ul>                                                                                                                                                                                                                                                                                                                                                                | <p>[ ] 0 Absent<br/>           [ ] 1 A l'impression que la vie ne vaut pas la peine d'être vécue.<br/>           [ ] 2 Souhaite être mort (toute pensée de mort possible dirigée contre soi-même).<br/>           [ ] 3 Idées ou gestes de suicide.<br/>           [ ] 4 Tentatives de suicide (toute tentative sérieuse vaut 4 points).</p>                                                                                                                                      |

Un score HAMD-7  $\leq 3$  indique une rémission totale.

Un score HAMD-7  $\geq 4$  indique une réponse nulle ou partielle.

**Score total**

## Annexe 2 : Détails sur la formation et les normes utilisées

Tous les chercheurs en soins primaires ont montré une grande fiabilité entre évaluateurs ( $\kappa_w$ ) à l'égard des mesures premières des symptômes dépressifs : les échelles de dépression de Hamilton à 7 et 17 questions (HAMD-7 0,83, HAMD-17 0,98), l'échelle de dépression de Montgomery-Asberg (MADRS 0,89) et l'échelle Impression clinique globale, sous-échelle de la sévérité de la maladie (CGI-S 0,80).

Pour tous les patients, toutes les questions d'évaluation ont été cotées par deux des chercheurs (R.S.M. et S.H.K.) avant que l'on donne de la formation aux chercheurs en soins primaires. On a dérivé une seule norme d'expert par consensus et, pour toutes les questions, on a mis à la disposition des évaluateurs une seule cote connexe :

- Les cotes qui se situaient à l'intérieur de l'intervalle de la norme d'expert  $\pm 1$  ont été jugées acceptables et ont reçu un crédit de 1.
- Les cotes qui se situaient à l'extérieur de l'intervalle ont reçu un crédit de 0.

On a calculé des valeurs kappa pondérées au moyen de la formule suivante :

$$\kappa_w = \frac{(p_o - p_c)}{(1 - p_c)}$$

Pour chaque question, on a calculé l'accord observé ( $p_o$ ) comme étant la proportion des participants qui ont reçu un crédit de 1. Par exemple, pour la question 1,  $n = xx$  (et cotes à l'intérieur de la norme d'expert  $\pm 1$ ) et  $n$  total =  $yy$  :

$$p_o = \frac{xx}{yy}$$

Pour chaque question, on a calculé l'accord aléatoire ( $p_c$ ) en fonction de la possibilité réelle d'accord, avec la norme d'expert  $\pm 1$ . Dans le cas de l'outil de mesure HAMD-17, on a appliqué des échelles à 5 et 3 points;  $p_c$  peut recevoir les valeurs suivantes, selon la norme d'expert.

Plage acceptée de l'accord aléatoire ( $p_c$ )

- |                                                                            |                                                                                 |
|----------------------------------------------------------------------------|---------------------------------------------------------------------------------|
| • Pour les questions de l'échelle à 5 points (questions 1-3, 7-11 et 15) : | • Pour les questions de l'échelle à 3 points (questions 4-6, 12-14, 16 et 17) : |
| 0, cotes acceptables 0 ou 1, $p_c = 2/5 = 0,4$                             | 0, cotes acceptables 0 ou 1, $p_c = 2/3 = 0,67$                                 |
| 1, cotes acceptables 0 ou 1 ou 2, $p_c = 3/5 = 0,6$                        | 1, cotes acceptables 0 ou 1 ou 2, $p_c = 3/3 = 1,0$                             |
| 2, cotes acceptables 1 ou 2 ou 3, $p_c = 3/5 = 0,6$                        | 2, cotes acceptables 1 ou 2, $p_c = 2/3 = 0,67$                                 |
| 3, cotes acceptables 2 ou 3 ou 4, $p_c = 3/5 = 0,6$                        |                                                                                 |
| 4, cotes acceptables 3 ou 4, $p_c = 2/5 = 0,4$                             |                                                                                 |

Il se peut que les valeurs  $\kappa_w$  plus élevées notées avec l'échelle HAMD-17 par rapport à celles que l'on a notées avec l'échelle HAMD-7 ne concordent pas avec les publications antérieures (Bagby *et al.*<sup>12</sup>, *Am J Psychiatry* 2004;161:2163-77). On étudie la question dans un manuscrit distinct.

## Annexe 3 : Les 48 chercheurs en soins primaires qui ont participé à l'étude de la version à 7 questions de l'échelle de dépression de Hamilton (HAMD-7), selon la province

**Colombie-Britannique** : D<sup>rs</sup> Brian Carlson, Coquitlam; Michael Golbey, Kelowna; John Kelly, Victoria; Douglas Leitner, Penticton; Paul Murray, Prince George; Anthony Nielson, Victoria; Anthony Ocana, Vancouver; Marianne Russell, Coquitlam.

**Alberta** : D<sup>rs</sup> George Barr, Calgary; John Bromley, Red Deer; Edward Papp, Edmonton.

**Ontario** : D<sup>rs</sup> Norman Abramson, Mississauga; Murray Awde, London; John Axler, Toronto; Yee Ling Chang, Toronto; Arif Chaudhri, Etobicoke; Chin Chung, Willowdale; Ronald Cox, Brampton; John Dawson, Richmond Hill; Larry Deutch, Ottawa; Giuseppe D'Ignazio, Hawkesbury; Alan Greenspoon, Hamilton; Steven Grossman, Richmond Hill; Margaret Grunebaum, North York; Tommy Hong, Mississauga; Alan Kaplan, Richmond Hill; Dennis Kavalsky, Hamilton; James Kim, Brampton; Christiane Kuntz, Ottawa; Douglas Mah, Mississauga; Krisanne Mendelssohn, Scarborough; Paul Perlon, Richmond Hill; Maryam Rostami, Milton; Andre Roch, Sudbury; Irving Siegel, Markham; Eric Silver, Toronto; Laurie Wells, Dundas; Linda Yolles, Toronto; Lauren Zeilig, Toronto; Paul Ziter, Windsor.

**Québec** : D<sup>rs</sup> Denis Beaulieu, Val-Bélair; Guy Chouinard, Charlesbourg; Jean Paul Czitrom, Montréal; Claude Laroche, Montréal; Suzanne Pelchat, Loretteville; Jean Ross, Sillery; Julie Ross, Charlesbourg.
